# Supplementary material for: Soybean-Oil-Based CO2-Switchable Surfactants with Multiple Heads
Source: MDPI journal article supplement (doi:10.3390/molecules26144342), 2021-07-18
Supplement: s1 [file s1]

*Supporting Information for*

**Soybean-Oil-Based CO<sub>2</sub>-Switchable Surfactants with Multiple Heads**

Huiyu Huang<sup>1</sup>, Xiaoling Huang<sup>1</sup>, Hongping Quan<sup>2</sup> and Xin Su<sup>1,\*</sup>

1 Polymer Research Institute, State Key Laboratory of Polymer Materials Engineering, Sichuan University, Chengdu 610065, China

2 Oil & Gas Field Applied Chemistry Key Laboratory of Sichuan Province, School of Chemistry and Chemical Engineering, Southwest Petroleum University, Xindu 610500 China

\* Correspondence: xinsu@scu.edu.cn

2021011503 #231-246 RT: 2.07-2.21 AV: 16 SB: 14 2.67-2.78 NL: 8.19E5  
T: + c ESI Q1 MS [100.000-1500.000]

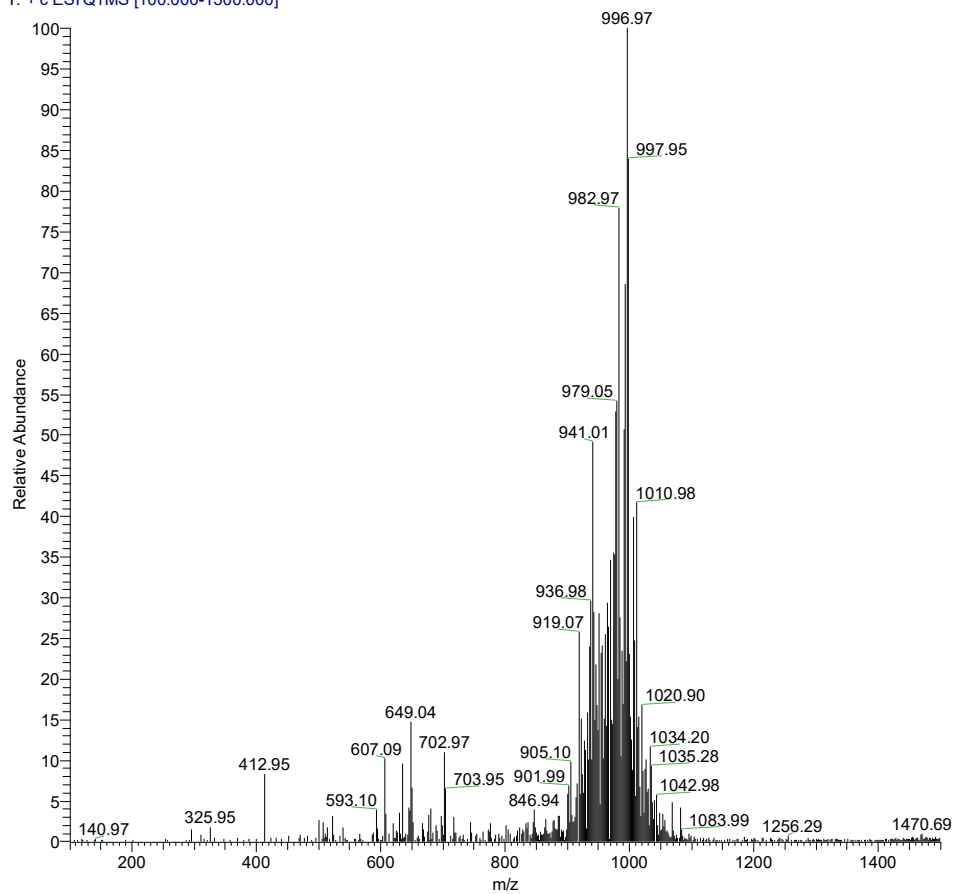

**Figure S1.** Mass spectrometry result of the oligomeric surfactant

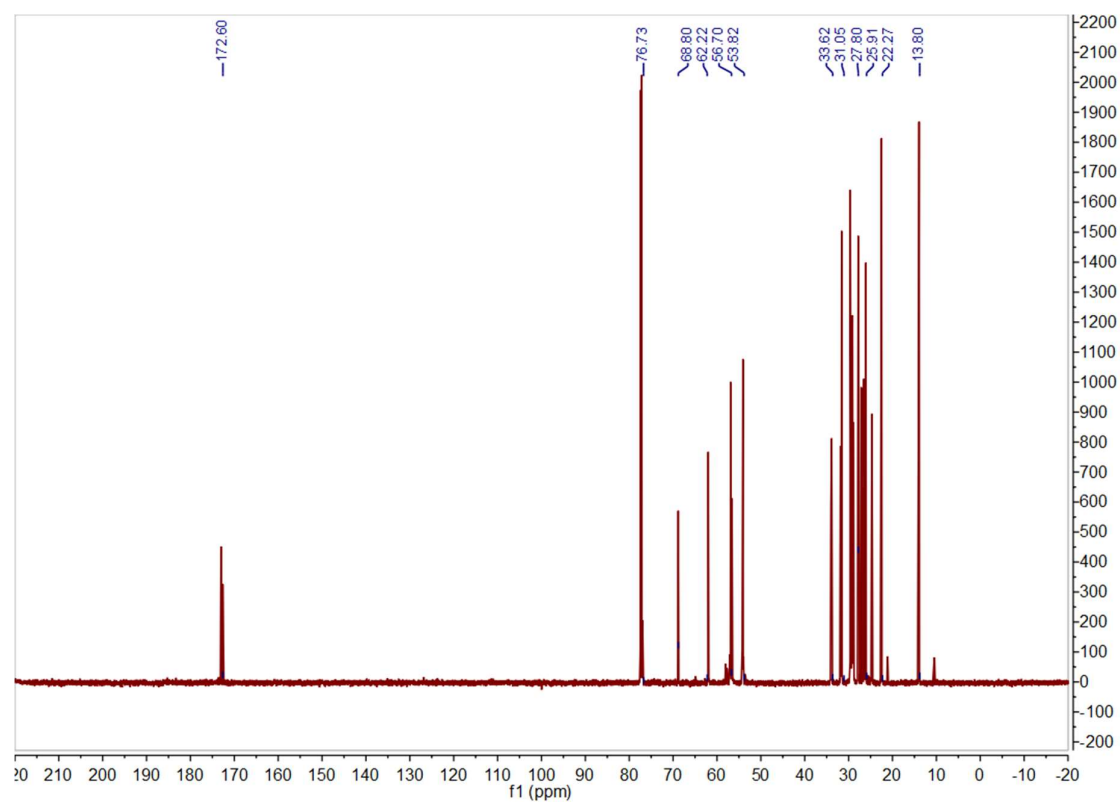

**Figure S2.**  $^{13}\text{C}$  NMR spectrum of the oligomeric surfactant

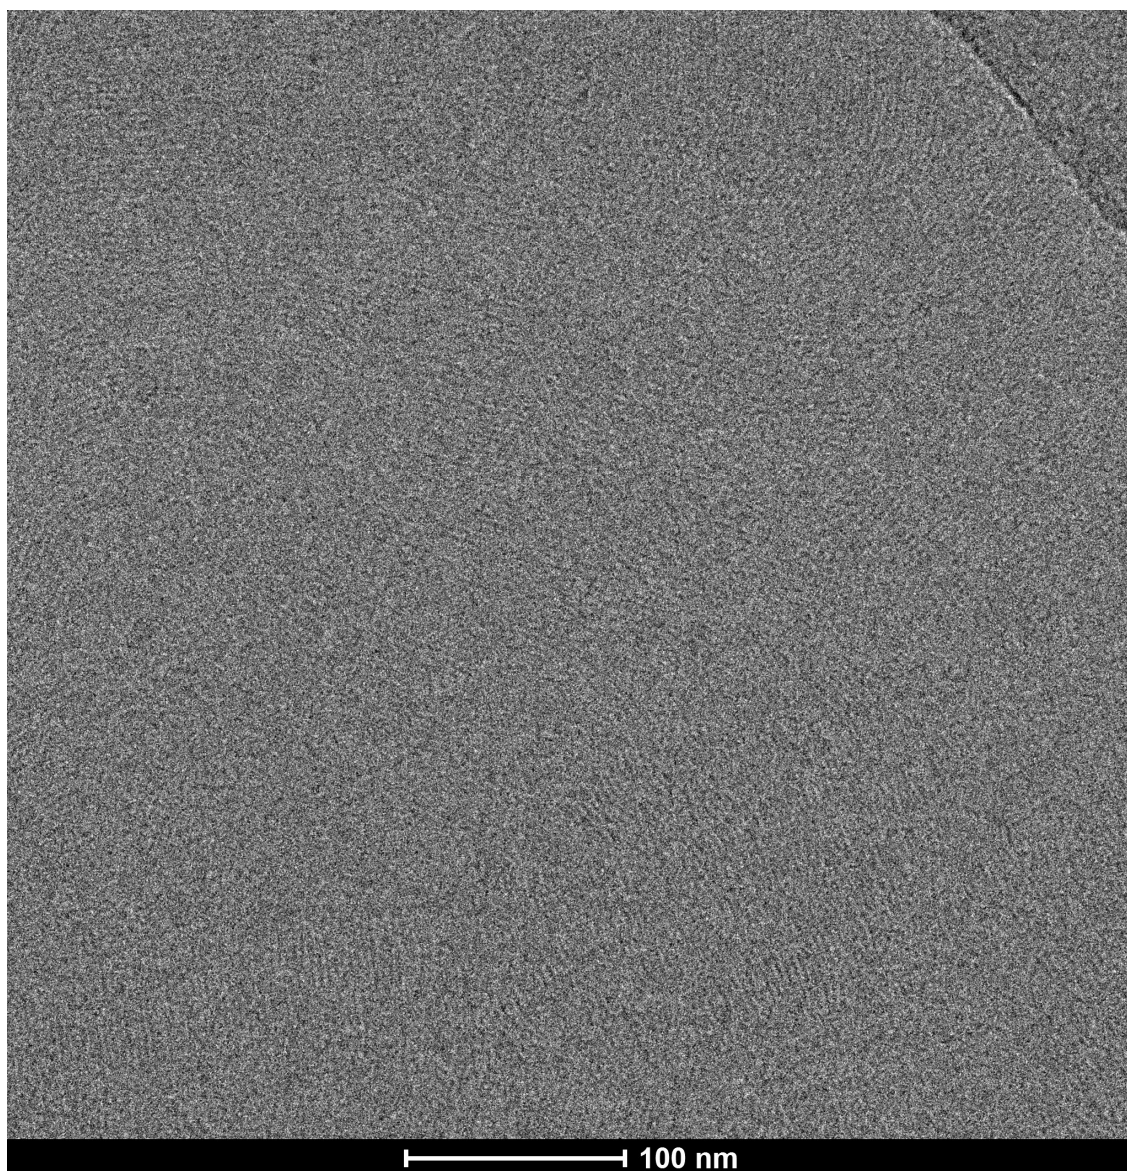

**Figure S3.** The Cryo-TEM image of aqueous solution for the oligomeric surfactant (12.0 mmol/L) after bubbling CO<sub>2</sub> for 30 min.
